# Supplementary material
Source: Springer Nature journal article supplement (https://www.springermedizin.de/resource/supplementary/12882_2013_772_MOESM6_ESM.pdf/9454686)

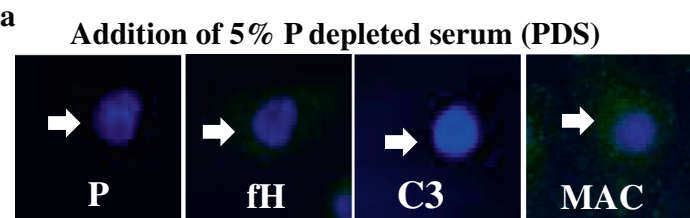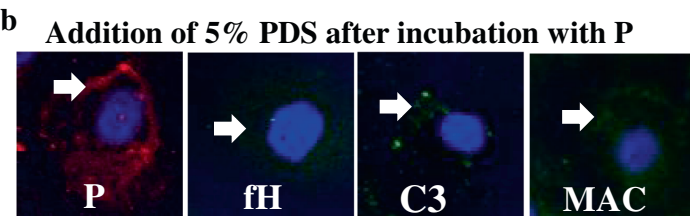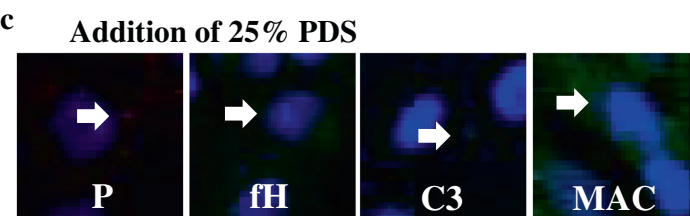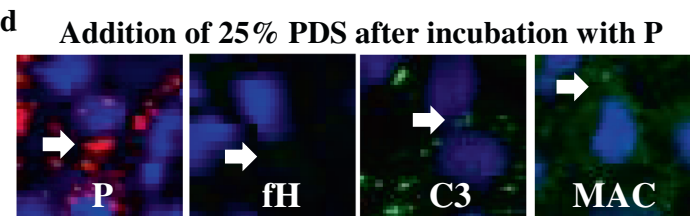

**5% PDS**

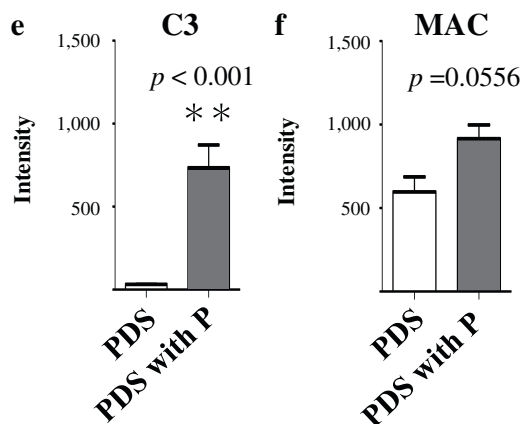

**25% PDS**

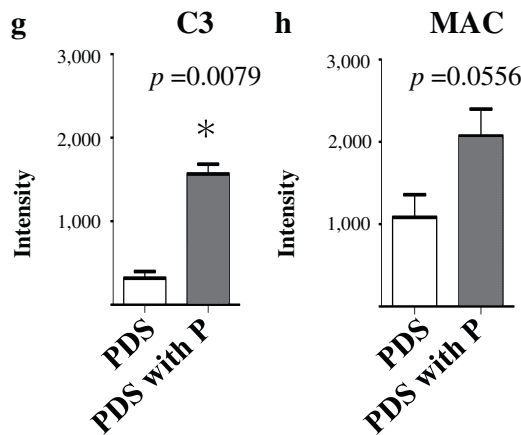

Supplement: MOESM6 [file 9454686]
